# Supplementary material for: Porous Silk Fibroin/Cellulose Hydrogels for Bone Tissue Engineering via a Novel Combined Process Based on Sequential Regeneration and Porogen Leaching
Source: PubMed Central journal article supplement (PMC7663655; doi:10.3390/molecules25215097), 2020-11-03
Supplement: molecules-25-05097-s001.pdf [file molecules-25-05097-s001.pdf]

## Supplementary Information

# Porous Silk Fibroin/Cellulose Hydrogels for Bone Tissue Engineering via a Novel Combined Process Based on Sequential Regeneration and Porogen Leaching

Burger Dennis<sup>1</sup>, Beaumont Marco<sup>\*2</sup>, Rosenau Thomas<sup>\*2</sup>, Tamada Yasushi<sup>\*1</sup>,

<sup>1</sup> Shinshu University, Faculty of Textile Science and Technology, Tokida 3-15-1, Ueda, Nagano 386-8567, Japan

<sup>2</sup> University of Natural Resources and Life Sciences Vienna (BOKU), Department for Chemistry, Institute of Chemistry of Renewable Resources, Konrad-Lorenz-Str. 24, Tulln, Austria

\* Correspondence: ytamada@shinshu-u.ac.jp (Y.T.); thomas.rosenau@boku.ac.at (T.R.); marcobeumont1@gmail.com (M.B.)

**Compression test data**

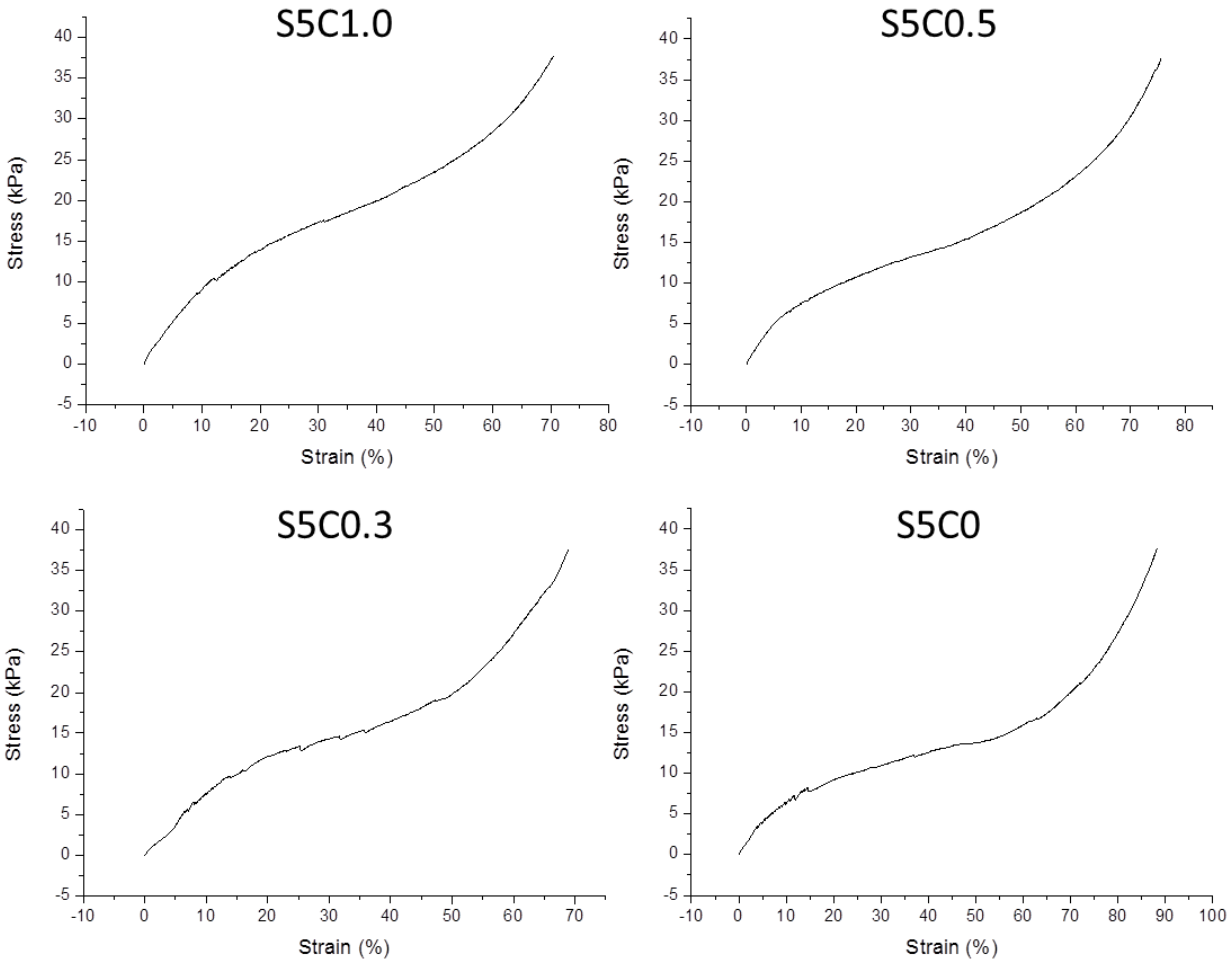

**Figure S1:** Stress-strain curves of all samples and control. Number of samples measured: S5C1.0 n=5; S5C0.5 n=5; S5C0.3 n=6; S5C0 n=4.

## Deconvolution results

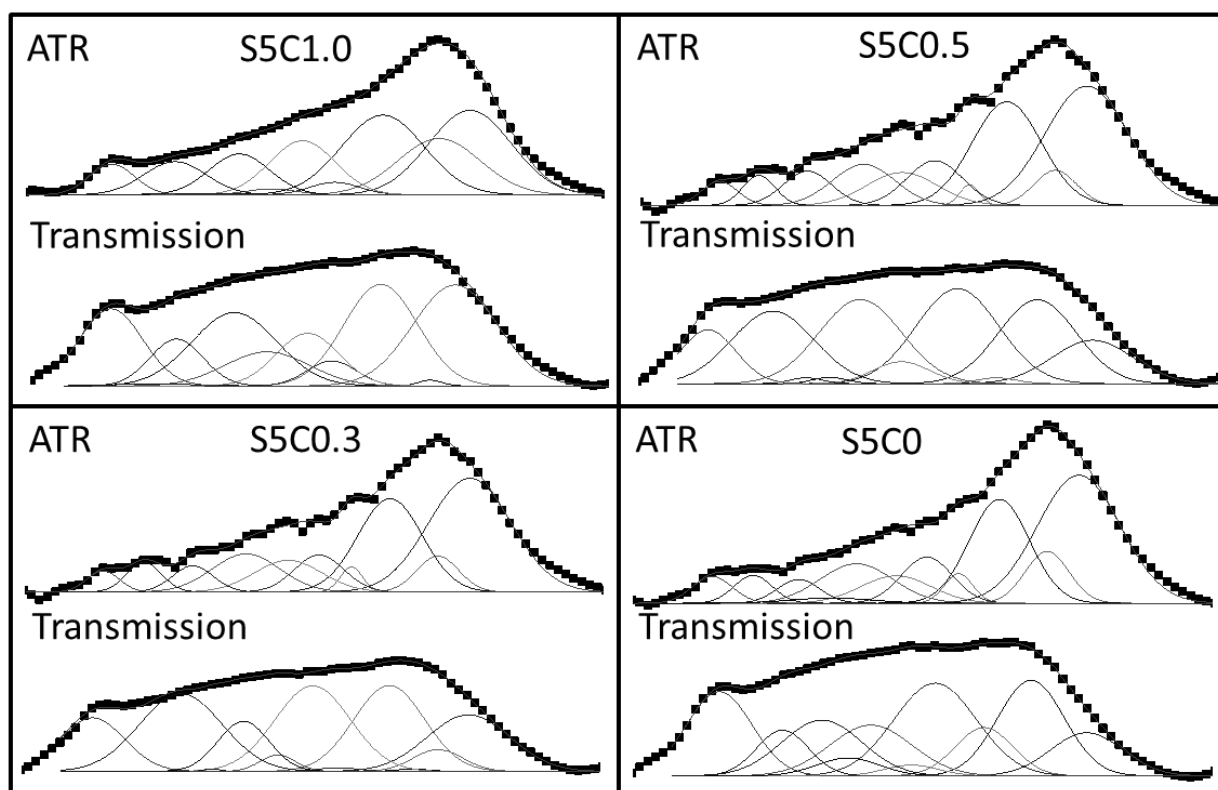

**Figure S2:** Diagrams of deconvoluted peaks in amide I band region. Bands for peak allocation to secondary structure are:  $\beta$ -sheet: 1611  $\text{cm}^{-1}$ , 1619  $\text{cm}^{-1}$ , 1626  $\text{cm}^{-1}$ , 1699  $\text{cm}^{-1}$ .  $\alpha$ -helix/random coil: 1631  $\text{cm}^{-1}$ , 1641  $\text{cm}^{-1}$ , 1649  $\text{cm}^{-1}$ . Turns and bends: 1659  $\text{cm}^{-1}$ , 1668  $\text{cm}^{-1}$ , 1674  $\text{cm}^{-1}$ , 1682  $\text{cm}^{-1}$ .

## SF matrix /cellulose scaffold composite structure

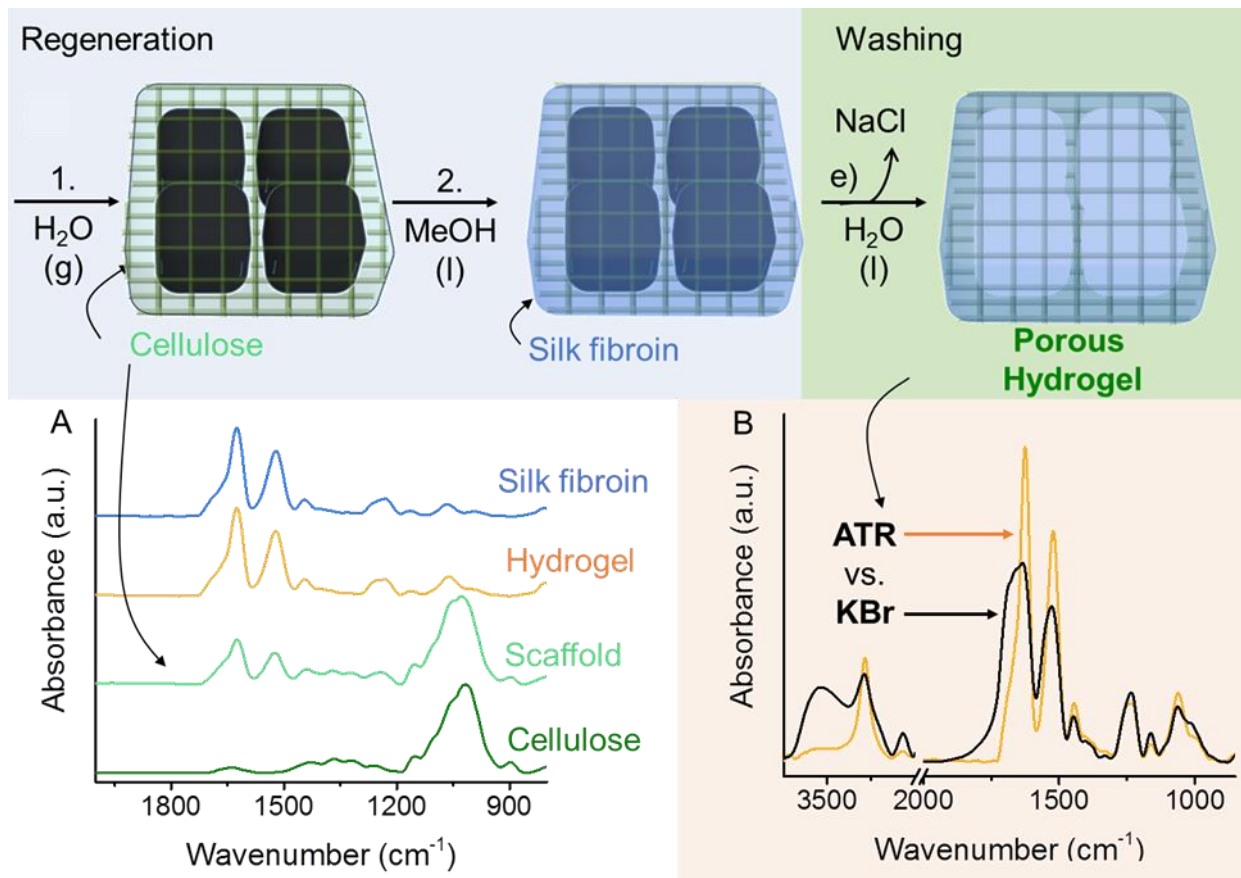

**Figure S3:** Cellulose framework structure embedded in a SF matrix. (A) Cellulose framework: By omitting methanol treatment of samples, a cellulose-rich, very stable hydrogel formed (“Scaffold” spectrum); that sample was compared with regenerated cellulose, degummed silk fibroin and lyophilized SF/cellulose hydrogel by ATR FTIR. (B) SF matrix: ATR and transmission spectra (KBr) normalized to the cellulose-specific band area  $1100\text{ cm}^{-1}$  to  $960\text{ cm}^{-1}$  of a lyophilized hydrogel. The larger amide band area in ATR mode, indicates a relatively increased SF content in the surface-near region compared to the bulk.

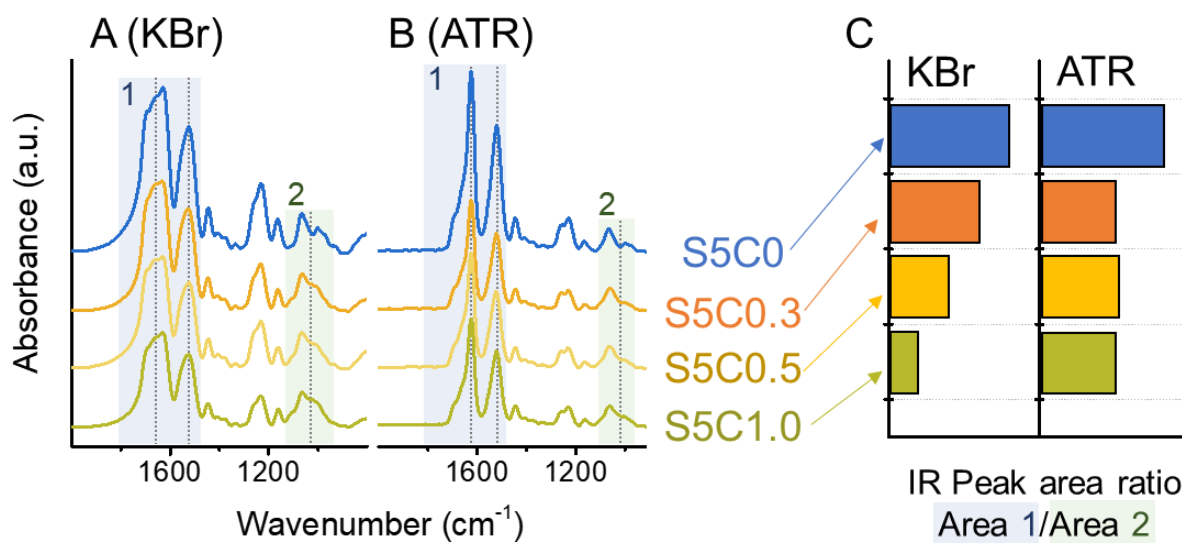

**Figure S4:** Different bulk and surface composition. Ratios of silk fibroin (SF) specific amide I and II band area and cellulose-specific band area at 1100 cm<sup>-1</sup> to 960 cm<sup>-1</sup> (respectively area 1 and 2 in A and B) of all samples decrease with increasing cellulose content in transmission mode (KBr) (C). In ATR mode ratios of samples do not differ, but show a lower ratio compared to the SF control. This indicates a richer SF structure in the surface regions of the hydrogel compared to bulk composition.
